# Supplementary material for: Agitation and apathy increase risk of dementia in psychiatric inpatients with late-onset psychiatric symptoms
Source: PubMed Central journal article supplement (PMC8080316; doi:10.1186/s12888-021-03210-5), 2021-04-28

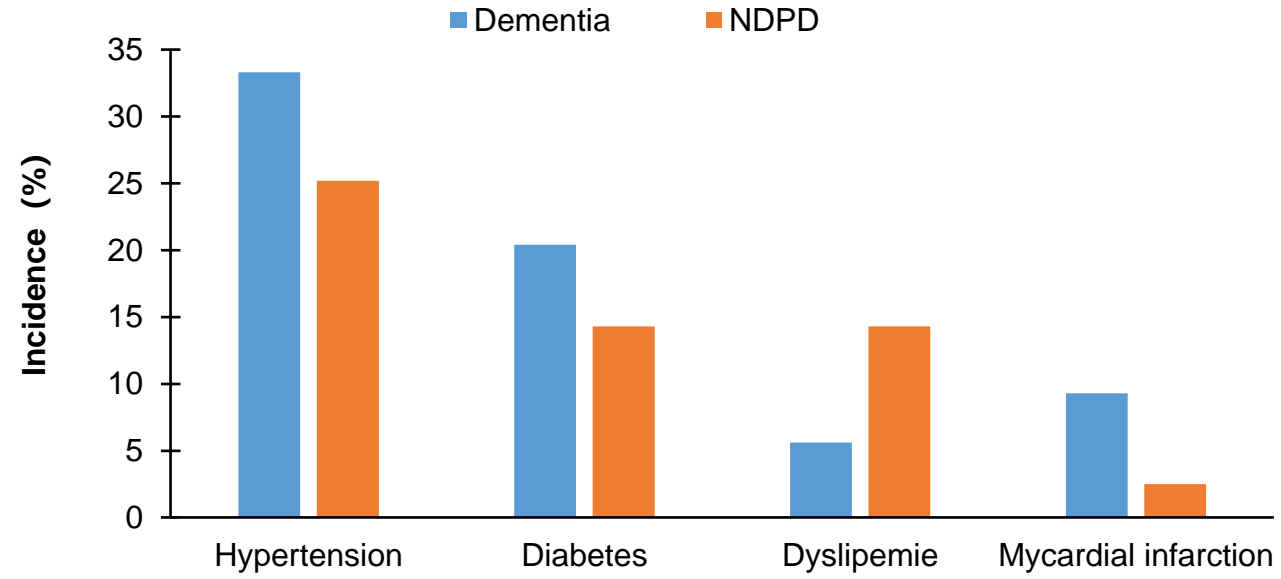

Supplement: 12888_2021_3210_MOESM1_ESM.pdf [file 12888_2021_3210_MOESM1_ESM.pdf]
